# Supplementary material for: A long-term study of gentoo penguin (Pygoscelis papua) population trends at a major Antarctic tourist site, Goudier Island, Port Lockroy
Source: Springer Nature journal article supplement (doi:10.1007/s10531-018-1635-6), 2018-10-06
Supplement: MOESM1 [file 16180630]

# **A long-term study of gentoo penguin (*Pygoscelis papua*) population trends at a major Antarctic tourist site, Goudier Island, Port Lockroy**

Journal of Biodiversity and Conservation

Michael J Dunn<sup>1\*</sup>, Jaume Forcada<sup>1</sup>, Jennifer A Jackson<sup>1</sup>, Claire M Waluda<sup>1</sup>, Camilla Nichol<sup>2</sup>, Philip N. Trathan<sup>1</sup>

<sup>1</sup>British Antarctic Survey, Natural Environment Research Council, Madingley Road, Cambridge CB3 0ET, UK

<sup>2</sup>UK Antarctic Heritage Trust, High Cross, Madingley Road, Cambridge CB3 0ET, UK

\* Corresponding author E-mail: [mdunn@bas.ac.uk](mailto:mdunn@bas.ac.uk)

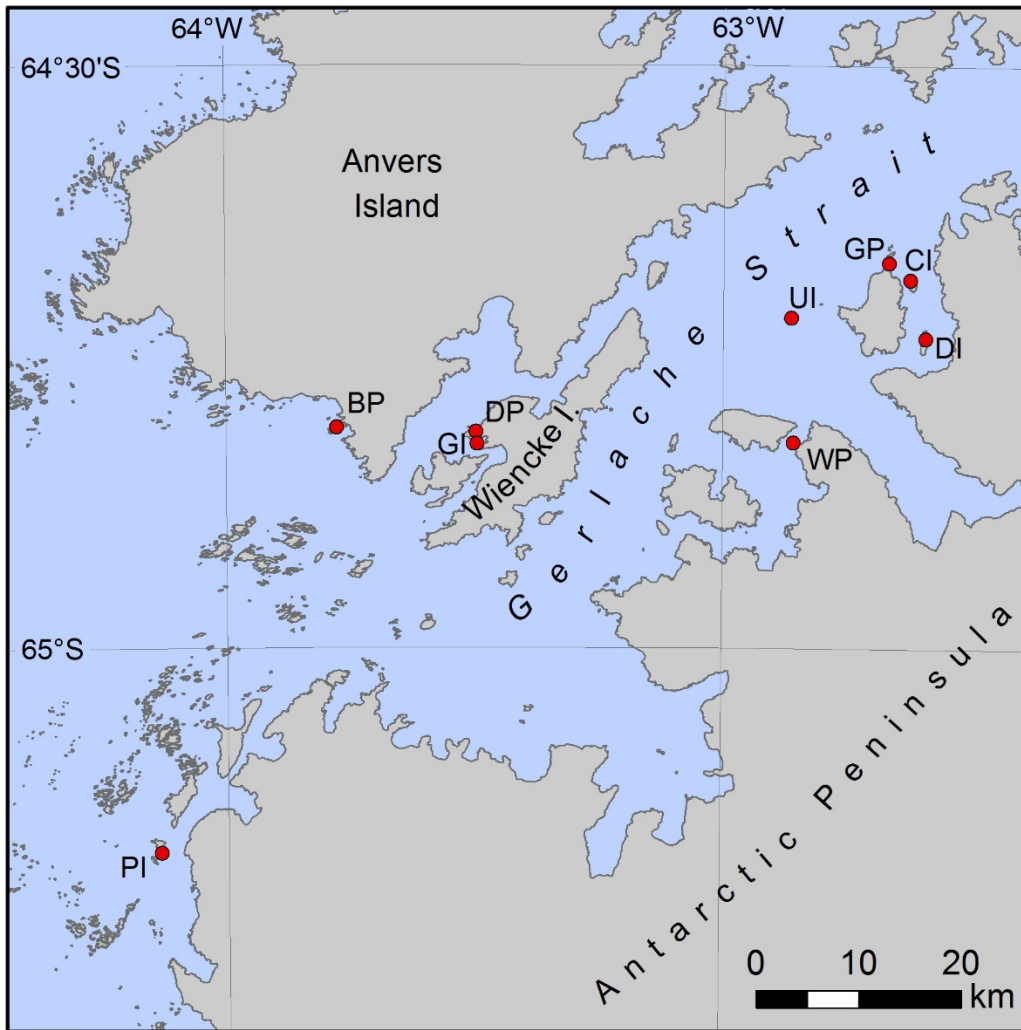

**Fig. S1** Location of additional regional colonies in relation to Goudier Island, Port Lockroy. GI = Goudier Island, DP = Damoy Point, BP = Biscoe Point, PI = Petermann Island, WP = Waterboat Point, UI = Useful Island, GP = Georges Point, CI = Cuverville Island, DI = Danco Island

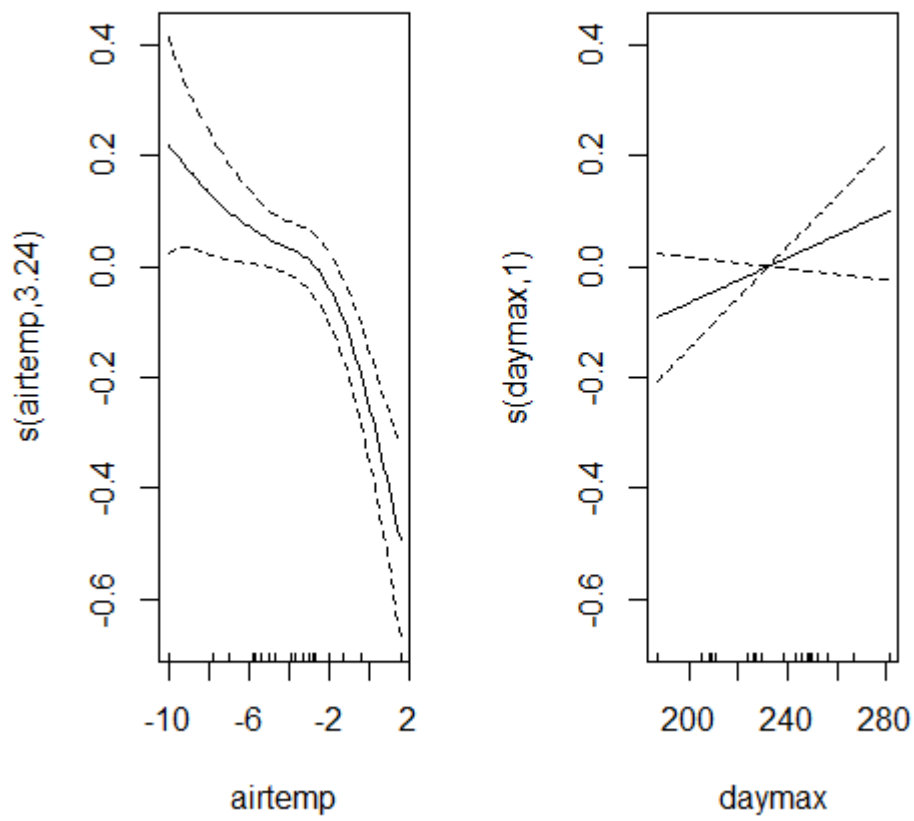

**Fig. S2** Smooth components of the best fitted model of nest counts. Variables include season ('year') as a standardized continuous variable, surface air temperature ('airtemp') and day of maximum sea ice extent ('daymax')
