# Supplementary material for: A long-term study of gentoo penguin (Pygoscelis papua) population trends at a major Antarctic tourist site, Goudier Island, Port Lockroy
Source: Springer Nature journal article supplement (doi:10.1007/s10531-018-1635-6), 2018-10-06
Supplement: MOESM2 [file 16180630]

# A long-term study of gentoo penguin (*Pygoscelis papua*) population trends at a major Antarctic tourist site, Goudier Island, Port Lockroy

Journal of Biodiversity and Conservation

Michael J Dunn<sup>1\*</sup>, Jaume Forcada<sup>1</sup>, Jennifer A Jackson<sup>1</sup>, Claire M Waluda<sup>1</sup>, Camilla Nichol<sup>2</sup>, Philip N. Trathan<sup>1</sup>

<sup>1</sup> British Antarctic Survey, Natural Environment Research Council, Madingley Road, Cambridge CB3 0ET, UK

<sup>2</sup> UK Antarctic Heritage Trust, High Cross, Madingley Road, Cambridge CB3 0ET, UK

\* Corresponding author E-mail:mdunn@bas.ac.uk

**Supplementary Table S1** Model selection for productivity. Models are expressed as formulas with number of chicks ('chicks') as response variable as a function of number of nests and zero or more explanatory variables, which include season ('syear') as a standardized continuous variable, type of colony ('type') –visited or not visited -, surface air temperature ('airtemp') and day of minimum and maximum sea ice extent ('iceminday', 'daymax'). Variables are fitted as linear or smoothed terms (expressed as s(variable)). For each model, the log-likelihood, number of parameters (np), AIC and  $\Delta$ AIC is shown

| model                                                                          | log-lik. | np  | AIC   | deltaAIC |
|--------------------------------------------------------------------------------|----------|-----|-------|----------|
| chicks ~ offset(lognest) + type + s(visitors, by = type)                       | -246.2   | 6   | 504.4 | 75       |
| chicks ~ offset(lognest) + type + s(visitors, by = type)                       | -246.2   | 6   | 504.4 | 75       |
| chicks ~ offset(lognest) + type + s(visitors)                                  | -246.2   | 5   | 502.4 | 73       |
| chicks ~ offset(lognest) + type + s(syear, by = type) + s(visitors, by = type) | -241.6   | 9   | 501.1 | 71.7     |
| chicks ~ offset(lognest) + type                                                | -246.3   | 4   | 500.7 | 71.3     |
| chicks ~ offset(lognest) + type + s(syear, by = type)                          | -243.4   | 7   | 500.6 | 71.2     |
| chicks ~ offset(lognest)                                                       | -246.3   | 3   | 498.7 | 69.3     |
| chicks ~ offset(lognest) + type + s(syear)                                     | -242.9   | 5.8 | 497.4 | 68       |

|                                                                                      |        |      |       |      |
|--------------------------------------------------------------------------------------|--------|------|-------|------|
| chicks ~ offset(lognest) + s(syear, by = type)                                       | -242.9 | 5.7  | 497.3 | 67.9 |
| chicks ~ offset(lognest) + s(syear)                                                  | -243.6 | 4.6  | 496.4 | 67   |
| chicks ~ offset(lognest) + s(iceminday, by = type)                                   | -242.1 | 6    | 496.2 | 66.8 |
| chicks ~ offset(lognest) + type + s(iceminday)                                       | -241.5 | 6.3  | 495.6 | 66.2 |
| chicks ~ offset(lognest) + s(iceminday)                                              | -241.5 | 5.3  | 493.6 | 64.2 |
| chicks ~ offset(lognest) + s(syear) + s(iceminday)                                   | -235.4 | 9.6  | 490   | 60.6 |
| chicks ~ offset(lognest) + s(airtemp)                                                | -233.4 | 9.1  | 485   | 55.6 |
| chicks ~ offset(lognest) + type + s(syear) + s(airtemp)                              | -221.1 | 13.9 | 469.9 | 40.5 |
| chicks ~ offset(lognest) + s(syear, by = type) + s(airtemp)                          | -220.6 | 14.1 | 469.5 | 40.1 |
| chicks ~ offset(lognest) + s(syear) + s(airtemp)                                     | -221   | 13   | 468   | 38.6 |
| chicks ~ offset(lognest) + s(syear, by = type) + s(airtemp) + s(iceminday)           | -214.5 | 17.4 | 463.9 | 34.5 |
| chicks ~ offset(lognest) + s(syear) + s(airtemp) + s(iceminday)                      | -213   | 16.2 | 458.3 | 28.9 |
| chicks ~ offset(lognest) + type + s(syear) + s(visitors) + s(airtemp) + s(daymax)    | -200   | 21.2 | 442.3 | 12.9 |
| chicks ~ offset(lognest) + type + s(syear) + s(visitors) + s(airtemp) + s(iceminday) | -200.3 | 20.6 | 441.8 | 12.4 |
| chicks ~ offset(lognest) + s(syear) + s(visitors) + s(airtemp) + s(iceminday)        | -200.5 | 19.7 | 440.2 | 10.8 |
| chicks ~ offset(lognest) + s(syear) + s(visitors) + s(airtemp) + s(daymax)           | -197.7 | 21   | 437.5 | 8.1  |
| chicks ~ offset(lognest) + s(syear) + s(visitors) + s(iceminday) + s(daymax)         | -195.5 | 20.3 | 431.7 | 2.3  |
| chicks ~ offset(lognest) + s(syear) + s(iceminday) + s(daymax)                       | -194.2 | 20.5 | 429.4 | 0    |

---

**Supplementary Table S2** Model selection for nest counts. Models are expressed as formulas with number of nest ('nests') as response variable as a function of zero or more explanatory variables, which include season ('syear') as a standardized continuous variable, type of colony ('type') –visited or not visited -, surface air temperature ('airtemp') and day of minimum sea ice extent ('iceminday'). Variables are fitted as linear or smoothed terms (expressed as s(variable)). For each model, the log-likelihood, number of parameters (np), AIC and  $\Delta$ AIC is shown

|    | model                                                              | log-lik. | np   | AIC   | deltaAIC |
|----|--------------------------------------------------------------------|----------|------|-------|----------|
| 1  | nests ~ s(syear) + s(visitors) + s(iceminday) + s(daymax)          | -271.1   | 7    | 556.2 | 117.5    |
| 2  | nests ~ s(syear, by = type) + s(airtemp) + s(iceminday)            | -270.8   | 7    | 555.6 | 116.9    |
| 3  | nests ~ s(syear) + s(visitors) + s(airtemp) + s(iceminday)         | -270.8   | 7    | 555.6 | 116.9    |
| 4  | nests ~ s(syear) + s(visitors) + s(airtemp) + s(daymax)            | -270.7   | 7    | 555.3 | 116.6    |
| 5  | nests ~ s(syear, by = type) + s(airtemp)                           | -270.8   | 6    | 553.7 | 115      |
| 6  | nests ~ s(syear) + s(airtemp) + s(iceminday)                       | -270.8   | 6    | 553.6 | 114.9    |
| 7  | nests ~ s(iceminday, by = type)                                    | -271.6   | 5    | 553.1 | 114.4    |
| 8  | nests ~ s(visitors, by = type)                                     | -271.5   | 5    | 553   | 114.3    |
| 9  | nests ~ s(syear, by = type)                                        | -271.4   | 5    | 552.8 | 114.1    |
| 10 | nests ~ s(syear) + s(iceminday)                                    | -271.2   | 5    | 552.5 | 113.8    |
| 11 | nests ~ s(syear) + s(airtemp)                                      | -270.9   | 5    | 551.7 | 113      |
| 12 | nests ~ s(iceminday)                                               | -271.6   | 4    | 551.2 | 112.5    |
| 13 | nests ~ s(airtemp)                                                 | -271.5   | 4    | 551.1 | 112.4    |
| 14 | nests ~ s(visitors)                                                | -271.5   | 4    | 551   | 112.3    |
| 15 | nests ~ s(syear)                                                   | -271.4   | 4    | 550.8 | 112.1    |
| 16 | nests ~ 1                                                          | -272     | 3    | 550   | 111.3    |
| 17 | nests ~ type                                                       | -229.6   | 4    | 467.2 | 28.5     |
| 18 | nests ~ type + s(iceminday)                                        | -226.1   | 5.1  | 462.3 | 23.6     |
| 19 | nests ~ type + s(visitors)                                         | -225.5   | 5    | 461   | 22.3     |
| 20 | nests ~ type + s(visitors, by = type)                              | -221.2   | 8.5  | 459.5 | 20.8     |
| 21 | nests ~ type + s(visitors, by = type)                              | -221.2   | 8.5  | 459.5 | 20.8     |
| 22 | nests ~ type + s(syear)                                            | -224.4   | 5    | 458.9 | 20.2     |
| 23 | nests ~ type + s(syear, by = type)                                 | -218.7   | 9.1  | 455.5 | 16.8     |
| 24 | nests ~ type + s(syear, by = type) + s(visitors, by = type)        | -216     | 11.4 | 454.9 | 16.2     |
| 25 | nests ~ type + s(syear) + s(visitors) + s(airtemp) + s(iceminday)  | -209     | 12.7 | 443.5 | 4.8      |
| 26 | nests ~ type + s(visitors) + s(airtemp) + s(daymax)                | -211.7   | 9.7  | 442.9 | 4.2      |
| 27 | nests ~ type + s(syear) + s(visitors) + s(airtemp) + s(daymax)     | -210.2   | 10.6 | 441.7 | 3        |
| 28 | nests ~ type + nest_1 + s(syear) + s(airtemp) + s(daymax)          | -209.8   | 10.9 | 441.3 | 2.6      |
| 29 | nests ~ type + s(syear) + s(airtemp)                               | -211.1   | 9.2  | 440.7 | 2        |
| 30 | nests ~ type + s(nest_1) + syear:visitors + s(airtemp) + s(daymax) | -209.1   | 11.1 | 440.3 | 1.6      |
| 31 | nests ~ type + s(syear) + s(airtemp) + s(daymax)                   | -210.2   | 9.8  | 439.9 | 1.2      |
| 32 | nests ~ type + syear:visitors + s(airtemp) + s(daymax)             | -209.3   | 10   | 438.7 | 0        |

**Supplementary Table S3** Gentoo penguin pairs: visited and control colonies, Goudier Island, Port

Lockroy, 1996/97 - 2016/17

| Season  | Colony |      |      |        |        |            |           |           |           |           |
|---------|--------|------|------|--------|--------|------------|-----------|-----------|-----------|-----------|
|         | Boat   | Base | Mast | Screen | Nissen | Anemometer | Control 1 | Control 2 | Control 3 | Control 4 |
| 1996/97 | 175    | 65   | 154  | 65     | 17     | 80         | 66        | 20        | 28        | 56        |
| 1997/98 | 174    | 62   | 153  | 69     | 20     | 79         | 63        | 19        | 27        | 57        |
| 1998/99 | 176    | 62   | 153  | 65     | 13     | 76         | 62        | 17        | 27        | 53        |
| 1999/00 | 192    | 69   | 167  | 74     | 13     | 83         | 66        | 25        | 36        | 54        |
| 2000/01 | 212    | 71   | 195  | 103    | 0      | 99         | 76        | 35        | 46        | 71        |
| 2001/02 | 127    | 10   | 103  | 32     | 0      | 37         | 42        | 18        | 3         | 31        |
| 2002/03 | 219    | 55   | 142  | 80     | 11     | 40         | 106       | 32        | 38        | 69        |
| 2003/04 | 182    | 50   | 141  | 68     | 4      | 34         | 35        | 106       | 46        | 56        |
| 2004/05 | 149    | 55   | 125  | 66     | 1      | 33         | 95        | 29        | 37        | 55        |
| 2005/06 | 167    | 63   | 123  | 70     | 0      | 30         | 104       | 24        | 39        | 61        |
| 2006/07 | 152    | 61   | 86   | 62     | 0      | 40         | 41        | 25        | 38        | 52        |
| 2007/08 | 169    | 52   | 123  | 66     | 0      | 15         | 31        | 69        | 37        | 55        |
| 2008/09 | 159    | 61   | 125  | 66     | 0      | 14         | 55        | 19        | 36        | 81        |
| 2009/10 | 199    | 65   | 117  | 65     | 7      | 36         | 47        | 20        | 41        | 65        |
| 2010/11 | 231    | 36   | 105  | 86     | 0      | 0          | 71        | 12        | 34        | 52        |
| 2011/12 | 217    | 55   | 114  | 83     | 0      | 42         | 43        | 18        | 31        | 55        |
| 2012/13 | 193    | 50   | 104  | 70     | 0      | 29         | 43        | 14        | 31        | 52        |
| 2013/14 | 154    | 48   | 113  | 69     | 0      | 31         | 36        | 10        | 29        | 50        |
| 2014/15 | 176    | 59   | 134  | 84     | 0      | 17         | 55        | 13        | 23        | 51        |
| 2015/16 | 159    | 46   | 136  | 71     | 0      | 42         | 42        | 10        | 14        | 39        |
| 2016/17 | 151    | 48   | 140  | 70     | 0      | 12         | 65        | 7         | 12        | 43        |

**Supplementary Table S4** Gentoo penguin chick numbers: visited and control colonies, Goudier Island,

Port Lockroy, 1996/97 - 2016/17

| Season  | Colony |      |      |        |        |            |           |           |           |           |
|---------|--------|------|------|--------|--------|------------|-----------|-----------|-----------|-----------|
|         | Boat   | Base | Mast | Screen | Nissen | Anemometer | Control 1 | Control 2 | Control 3 | Control 4 |
| 1996/97 | 269    | 84   | 243  | 94     | 22     | 104        | 101       | 26        | 47        | 90        |
| 1997/98 | 304    | 103  | 249  | 103    | 33     | 124        | 95        | 32        | 41        | 93        |

|         |     |     |     |     |   |     |     |     |    |     |
|---------|-----|-----|-----|-----|---|-----|-----|-----|----|-----|
| 1998/99 | 189 | 66  | 94  | 58  | 3 | 60  | 72  | 14  | 28 | 58  |
| 1999/00 | 263 | 80  | 227 | 102 | 2 | 117 | 96  | 35  | 39 | 79  |
| 2000/01 | 314 | 98  | 281 | 147 | 0 | 133 | 118 | 52  | 61 | 111 |
| 2001/02 | 62  | 9   | 17  | 5   | 0 | 39  | 20  | 6   | 1  | 10  |
| 2002/03 | 331 | 81  | 221 | 118 | 7 | 62  | 160 | 52  | 55 | 99  |
| 2003/04 | 298 | 79  | 224 | 113 | 1 | 56  | 51  | 140 | 57 | 86  |
| 2004/05 | 228 | 70  | 168 | 92  | 1 | 34  | 120 | 34  | 54 | 76  |
| 2005/06 | 267 | 97  | 190 | 115 | 0 | 40  | 131 | 29  | 56 | 71  |
| 2006/07 | 208 | 91  | 131 | 90  | 0 | 51  | 71  | 39  | 65 | 70  |
| 2007/08 | 232 | 72  | 163 | 81  | 0 | 15  | 27  | 73  | 47 | 67  |
| 2008/09 | 219 | 102 | 148 | 99  | 0 | 18  | 69  | 33  | 54 | 94  |
| 2009/10 | 280 | 97  | 154 | 89  | 0 | 41  | 66  | 34  | 56 | 82  |
| 2010/11 | 233 | 34  | 120 | 99  | 0 | 0   | 58  | 9   | 9  | 51  |
| 2011/12 | 247 | 58  | 139 | 77  | 0 | 33  | 45  | 19  | 33 | 75  |
| 2012/13 | 232 | 68  | 143 | 113 | 0 | 40  | 64  | 25  | 39 | 74  |
| 2013/14 | 182 | 61  | 118 | 85  | 0 | 29  | 30  | 8   | 25 | 53  |
| 2014/15 | 107 | 67  | 164 | 99  | 0 | 16  | 23  | 59  | 20 | 62  |
| 2015/16 | 135 | 41  | 97  | 55  | 0 | 32  | 32  | 6   | 10 | 39  |
| 2016/17 | 135 | 45  | 125 | 64  | 0 | 9   | 57  | 5   | 7  | 37  |

**Supplementary Table S5** Gentoo penguin pairs at eight additional colonies located along the

Gerlache Strait within 50 km of Goudier Island, 1996/97-2015/16

| Season  | Colony       |                   |              |             |               |              |               |                 |
|---------|--------------|-------------------|--------------|-------------|---------------|--------------|---------------|-----------------|
|         | Biscoe Point | Cuverville Island | Danco Island | Damoy Point | Georges Point | Jougla Point | Useful Island | Waterboat Point |
| 1996/97 | 1801         |                   |              |             | 383           | 1595         |               |                 |
| 1997/98 |              |                   |              |             | 397           | 1545         |               | 1455            |
| 1998/99 |              |                   |              | 2041        | 327           | 1437         |               | 4               |
| 1999/00 | 1665         |                   |              |             |               | 1681         |               |                 |
| 2000/01 | 1335         |                   |              |             | 356           | 1934         |               |                 |
| 2001/02 | 692          |                   |              |             |               | 837          |               |                 |
| 2002/03 | 1025         |                   |              | 1928        |               | 1556         |               |                 |
| 2003/04 | 644          | 5990              |              |             |               | 1540         |               |                 |
| 2004/05 | 753          |                   |              | 2022        | 1995          | 1306         | 1861          | 2456            |
| 2005/06 | 902          | 6294              |              | 2273        | 2464          | 1409         |               |                 |
| 2006/07 | 877          | 4420              | 2506         |             | 260           | 1282         |               |                 |

|         |      |      |      |      |      |      |      |      |
|---------|------|------|------|------|------|------|------|------|
| 2007/08 |      |      | 2084 | 2055 | 1200 | 1276 | 1432 |      |
| 2008/09 |      | 6878 | 2213 | 2158 | 2196 | 1479 | 1464 | 2681 |
| 2009/10 | 2401 | 6468 | 3632 | 2148 | 2555 | 1521 |      |      |
| 2010/11 | 2404 | 990  | 2115 | 1823 | 1158 | 1091 | 175  | 2    |
| 2011/12 | 3081 | 6336 | 2558 | 2091 | 2408 | 1172 |      | 2509 |
| 2012/13 | 3197 | 5950 | 2665 | 2355 | 3296 | 1178 |      | 3154 |
| 2013/14 |      | 7007 | 2778 | 2299 | 2824 | 1265 |      | 3118 |
| 2014/15 |      | 9176 | 3248 | 2560 | 3443 | 1345 | 1810 | 3915 |
| 2015/16 |      | 9648 | 3476 | 2079 | 3354 | 1116 |      | 3963 |

**Supplementary Table S6** Numbers of people (tourists and crew) from all vessels landing on Goudier Island and Jougla Point, Port Lockroy, 1996/97 - 2016/17

| Season  | People landed  |              |
|---------|----------------|--------------|
|         | Goudier Island | Jougla Point |
| 1996/97 | 262            | 102          |
| 1997/98 | 467            | 450          |
| 1998/99 | 1302           | 1114         |
| 1999/00 | 2246           | 1519         |
| 2000/01 | 2575           | 2949         |
| 2001/02 | 4412           | 2796         |
| 2002/03 | 6928           | 6575         |
| 2003/04 | 9570           | 7593         |
| 2004/05 | 9996           | 7913         |
| 2005/06 | 12844          | 8379         |
| 2006/07 | 16770          | 9981         |
| 2007/08 | 18265          | 11887        |
| 2008/09 | 15353          | 8938         |
| 2009/10 | 13841          | 9078         |
| 2010/11 | 12654          | 6505         |
| 2011/12 | 17071          | 8583         |
| 2012/13 | 19248          | 9135         |
| 2013/14 | 14234          | 6928         |
| 2014/15 | 19006          | 7116         |
| 2015/16 | 19834          | 6986         |

|         |       |      |
|---------|-------|------|
| 2016/17 | 19688 | 8269 |
|---------|-------|------|

**Supplementary Table S7** Number of people (tourists and crew) at five additional colonies located along the Gerlache Strait within 50 km of Goudier Island, 2001/02-2016/17

| Season  | Colony            |              |             |               |                 |
|---------|-------------------|--------------|-------------|---------------|-----------------|
|         | Cuverville Island | Danco Island | Damoy Point | Useful Island | Waterboat Point |
| 2001/02 | 4115              | 54           | 683         | 202           | 3758            |
| 2002/03 | 4749              | 382          | 1502        | 145           | 2920            |
| 2003/04 | 8786              | 803          | 741         |               | 4258            |
| 2004/05 | 9797              | 2123         | 1464        | 379           | 4495            |
| 2005/06 | 9768              | 3172         | 1266        | 174           | 6028            |
| 2006/07 | 13105             | 3935         | 1815        | 910           | 5929            |
| 2007/08 | 13570             | 3806         | 1599        | 726           | 4548            |
| 2008/09 | 12794             | 3232         | 2323        | 1236          | 5207            |
| 2009/10 | 11435             | 4372         | 2059        | 795           | 1887            |
| 2010/11 | 10495             | 3016         | 1886        | 320           | 1693            |
| 2011/12 | 11900             | 5293         | 4627        | 64            | 2041            |
| 2012/13 | 12189             | 6040         | 3790        | 533           | 1868            |
| 2013/14 | 17101             | 7699         | 3082        | 622           | 2338            |
| 2014/15 | 15604             | 7858         | 4376        | 912           | 3076            |
| 2015/16 | 21094             | 10780        | 4735        | 1081          | 5418            |
| 2016/17 | 27055             | 12065        | 8565        | 1603          | 7331            |
